# Supplementary material
Source: publisher figshare collection journal article supplement (https://acs.figshare.com/ndownloader/files/31585210)
Supplement: Supplementary file 1 [file 31585210]

Compound	SMILES	Dissociation constant Kd against IL2 (uM)	Dissociation constant Kd against HSA (uM)	Dissociation constant Kd against AGP (uM)	Dissociation constant Kd against L19 (uM)	Dissociation constant Kd against TNF (uM)	Dissociation constant Kd against IL15 (uM)
AG-173/985	C#CCOC1=CC=C(C[C@H](NC(CC2(CC)OCCC(C3=CC=C4)=C2NC3=C4CC)=O)C(NCCOCCOCCNC(NC(C=C56)=CC=C6C7(OC5=O)C(C=C8)=C(OC9=C7C=CC(O)=C9)C=C8O)=S)=O)C=C1	1.5
AG-156/1015	OC1=CC(OC2=C(C34OC(C5=CC(NC(NCCOCCOCCNC([C@H](CC(C=C6)=CC(I)=C6O)NC(C7=CC8=C(N7)C=CC=C8F)=O)=O)=S)=CC=C45)=O)C=CC(O)=C2)=C3C=C1	0.63
AG-156/1317	O=C(N[C@H](C(NCCOCCOCCNC(NC1=CC(C(OC23C(C=CC(O)=C4)=C4OC5=C3C=CC(O)=C5)=O)=C2C=C1)=S)=O)CC(C=C6I)=CC=C6O)C7=CC=C(CNCC8=CC=CC=C8C(F)(F)F)C=C7	3.1
1	OC1=CC(OC2=C(C34OC(C5=CC(NC(NCCOCCNC([C@H](CC6=CC(I)=C(O)C=C6)NC(C7=CC8=C(N7)C(F)=CC=C8)=O)=O)=S)=CC=C45)=O)C=CC(O)=C2)=C3C=C1	0.25	0.29	0.84	6.5	5.1	Non detectable
2	OC1=CC(OC2=C(C34OC(C5=CC(NC(NCCOCCNC([C@@H](CC(C=C6)=CC(I)=C6O)NC(C7=CC8=C(N7)C=CC=C8F)=O)=O)=S)=CC=C45)=O)C=CC(O)=C2)=C3C=C1	0.21	0.22
3	OC1=CC(OC2=C(C34OC(C5=CC(NC(NCCOCCNC([C@H](CC6=CC(Br)=C(O)C=C6)NC(C7=CC8=C(N7)C=CC=C8F)=O)=O)=S)=CC=C45)=O)C=CC(O)=C2)=C3C=C1	0.3	0.78
4	OC1=CC(OC2=C(C34OC(C5=CC(NC(NCCOCCNC([C@H](CC(C=C6)=CC(Cl)=C6O)NC(C7=CC8=C(C=CC=C8F)N7)=O)=O)=S)=CC=C45)=O)C=CC(O)=C2)=C3C=C1	0.59	0.58
5	OC1=CC(OC2=C(C34OC(C5=CC(NC(NCCOCCNC([C@H](CC6=CC(F)=C(O)C=C6)NC(C7=CC8=C(C=CC=C8F)N7)=O)=O)=S)=CC=C45)=O)C=CC(O)=C2)=C3C=C1	0.92	1.7
6	OC1=CC(OC2=C(C34OC(C5=CC(NC(NCCOCCNC([C@H](CC6=CC([N+]([O-])=O)=C(O)C=C6)NC(C7=CC8=C(N7)C=CC=C8F)=O)=O)=S)=CC=C45)=O)C=CC(O)=C2)=C3C=C1	0.72	0.31
7	OC1=CC(OC2=C(C34OC(C5=CC(NC(NCCOCCNC([C@H](CC6=CC=C(OC)C=C6)NC(C7=CC8=C(C=CC=C8F)N7)=O)=O)=S)=CC=C45)=O)C=CC(O)=C2)=C3C=C1	1.3	0.43
8	OC1=CC(OC2=C(C34OC(C5=CC(NC(NCCOCCNC([C@H](CC6=CC(C=CC=C7)=C7C=C6)NC(C8=CC9=C(C=CC=C9F)N8)=O)=O)=S)=CC=C45)=O)C=CC(O)=C2)=C3C=C1	0.75	0.03
9	OC1=CC(OC2=C(C34OC(C5=CC(NC(NCCOCCNC([C@H](CC6=CC=C(I)C=C6)NC(C7=CC8=C(C=CC=C8F)N7)=O)=O)=S)=CC=C45)=O)C=CC(O)=C2)=C3C=C1	0.64	0.07
10	OC1=CC(OC2=C(C34OC(C5=CC(NC(NCCOCCNC([C@H](CC(C=C6)=CC=C6O)NC(C7=CC8=C(N7)C=CC=C8F)=O)=O)=S)=CC=C45)=O)C=CC(O)=C2)=C3C=C1	1.4	1.5
11	OC1=CC(OC2=C(C34OC(C5=CC(NC(NCCOCCNC([C@H](CC6=CC(I)=CC=C6)NC(C7=CC8=C(C=CC=C8F)N7)=O)=O)=S)=CC=C45)=O)C=CC(O)=C2)=C3C=C1	0.25	0.02
12	OC1=CC(OC2=C(C34OC(C5=CC(NC(NCCOCCNC([C@H](CC(C=C6)=CC(I)=C6O)NC(C7=CNC8=C7C(F)=CC=C8)=O)=O)=S)=CC=C45)=O)C=CC(O)=C2)=C3C=C1	0.51	0.82
13	OC1=CC(OC2=C(C34OC(C5=CC(NC(NCCOCCNC([C@H](CC(C=C6)=CC(I)=C6O)NC(C7=CC8=C(C=CC(F)=C8)N7)=O)=O)=S)=CC=C45)=O)C=CC(O)=C2)=C3C=C1	0.33	0.27
14	OC1=CC(OC2=C(C34OC(C5=CC(NC(NCCOCCNC([C@H](CC(C=C6)=CC(I)=C6O)NC(C7=CC8=C(N7)C=C(F)C=C8)=O)=O)=S)=CC=C45)=O)C=CC(O)=C2)=C3C=C1	0.28	0.17
15	OC1=CC(OC2=C(C34OC(C5=CC(NC(NCCOCCNC([C@H](CC(C=C6)=CC(I)=C6O)NC(C7=CC8=C(C(F)=CC=C8)N7)=O)=O)=S)=CC=C45)=O)C=CC(O)=C2)=C3C=C1	0.39	0.21
16	OC1=CC(OC2=C(C34OC(C5=CC(NC(NCCOCCNC([C@H](CC(C=C6)=CC(I)=C6O)NC(C7=CC8=C(N7)C=CC=C8)=O)=O)=S)=CC=C45)=O)C=CC(O)=C2)=C3C=C1	0.42	0.39
17	OC1=CC(OC2=C(C34OC(C5=CC(NC(NCCOCCNC([C@H](CC(C=C6)=CC(I)=C6O)NC(C7=CC8=C(O7)C=CC=C8F)=O)=O)=S)=CC=C45)=O)C=CC(O)=C2)=C3C=C1	2.2	1
18	OC1=CC(OC2=C(C34OC(C5=CC(NC(NCCOCCNC([C@@H](NC([C@H](CC6=CC=C(O)C(I)=C6)NC(C7=CC8=C(C=CC=C8F)N7)=O)=O)CCCNC(N)=N)=O)=S)=CC=C45)=O)C=CC(O)=C2)=C3C=C1	0.34	2	3.4	Non detectable	4.4	Non detectable
19	OC1=CC(OC2=C(C34OC(C5=CC(NC(NCCOCCNC([C@@H](NC([C@@H](CC6=CC=C(O)C(I)=C6)NC(C7=CC8=C(C=CC=C8F)N7)=O)=O)CCCNC(N)=N)=O)=S)=CC=C45)=O)C=CC(O)=C2)=C3C=C1	1.2	3.3	>10
20	OC1=CC(OC2=C(C34OC(C5=CC(NC(NCCOCCNC([C@H](NC([C@@H](CC6=CC=C(O)C(I)=C6)NC(C7=CC8=C(C=CC=C8F)N7)=O)=O)CCCNC(N)=N)=O)=S)=CC=C45)=O)C=CC(O)=C2)=C3C=C1	0.71	7.2	4
21	OC1=CC(OC2=C(C34OC(C5=CC(NC(NCCOCCNC([C@H](NC([C@H](CC6=CC=C(O)C(I)=C6)NC(C7=CC8=C(C=CC=C8F)N7)=O)=O)CCCNC(N)=N)=O)=S)=CC=C45)=O)C=CC(O)=C2)=C3C=C1	0.87	9.6	3
Ro26-4550 as fluorescein conjugate	O=C(N[C@H](C(NCCOCCNC(NC1=CC(C(OC23C(C=CC(O)=C4)=C4OC5=C3C=CC(O)=C5)=O)=C2C=C1)=S)=O)CC(C=C6)=CC=C6C#CC7=CC=CC=C7)C[C@@H]8CN(C(N)=N)CCC8	1.5	4	4.9	Non detectable	Non detectable	Non detectable
